# Supplementary material for: Effectiveness of Household Disinfection Techniques to Remove SARS-CoV-2 from Cloth Masks
Source: MDPI journal article supplement (doi:10.3390/pathogens11080916), 2022-08-15
Supplement: s1 [file s1]

# Effectiveness of household disinfection techniques to remove SARS-CoV-2 from cloth masks

Supplementary Materials

Supplementary Table S1

| B.1.1.28                          |                           |                                    |                              |                                    |                              |                                    |                              |                                    |                              |                                    |                              |                                    |                              |
|-----------------------------------|---------------------------|------------------------------------|------------------------------|------------------------------------|------------------------------|------------------------------------|------------------------------|------------------------------------|------------------------------|------------------------------------|------------------------------|------------------------------------|------------------------------|
| Chemical Agents                   | viral suspension (Log 10) | Soak Time                          |                              |                                    |                              |                                    |                              |                                    |                              |                                    |                              |                                    |                              |
|                                   |                           | 10 min                             |                              |                                    |                              |                                    |                              | 30 min                             |                              |                                    |                              |                                    |                              |
|                                   |                           | 1 <sup>st</sup> Rinse <sup>a</sup> |                              | 2 <sup>nd</sup> Rinse <sup>a</sup> |                              | 3 <sup>rd</sup> Rinse <sup>a</sup> |                              | 1 <sup>st</sup> Rinse <sup>a</sup> |                              | 2 <sup>nd</sup> Rinse <sup>a</sup> |                              | 3 <sup>rd</sup> Rinse <sup>a</sup> |                              |
|                                   |                           | Ct value mean                      | Viral Load mean <sup>b</sup> | Ct value mean                      | Viral Load mean <sup>b</sup> | Ct value mean                      | Viral Load mean <sup>b</sup> | Ct value mean                      | Viral Load mean <sup>b</sup> | Ct value mean                      | Viral Load mean <sup>b</sup> | Ct value mean                      | Viral Load mean <sup>b</sup> |
| Soap Powder                       | Log <sup>1</sup>          | 24,1                               | 2,72 x 10 <sup>5</sup>       | 26,45                              | 3,65 x 10 <sup>4</sup>       | 28,51                              | 5,88 x10 <sup>3</sup>        | 23,8                               | 3,52 x 10 <sup>5</sup>       | 25,61                              | 7 x 10 <sup>4</sup>          | 27,09                              | 2.03 x 10 <sup>4</sup>       |
|                                   | Log <sup>2</sup>          | 28                                 | 8,58 x 10 <sup>3</sup>       | 29,74                              | 1,88 x 10 <sup>3</sup>       | 31,52                              | 3,94 x 10 <sup>2</sup>       | 29,06                              | 3,4 x10 <sup>3</sup>         | 31,18                              | 5,37 x 10 <sup>2</sup>       | 32,95                              | 1,13 x 10 <sup>2</sup>       |
|                                   | Log <sup>3</sup>          | 32,03                              | 2,58 x 10 <sup>2</sup>       | 34,14                              | 3,96 x 10 <sup>1</sup>       | 35,42                              | 1,30 x 10 <sup>1</sup>       | 31,79                              | 3,3 x 10 <sup>2</sup>        | 34,57                              | 2,71 x 10 <sup>1</sup>       | 35,65                              | 1,09 x 10 <sup>1</sup>       |
|                                   | Log <sup>4</sup>          | 33,81                              | 5,68 x 10 <sup>1</sup>       | 35,93                              | 1,04 x 10 <sup>1</sup>       | 38,28                              | 1,05                         | 33,11                              | 9,76 x 10 <sup>1</sup>       | 34,87                              | 2,39 x 10 <sup>1</sup>       | 38,07                              | 1,35                         |
|                                   | Log <sup>5</sup>          | 35,04                              | 1,94 x 10 <sup>1</sup>       | 36,57                              | 5,55                         | 40                                 | 0                            | 36,31                              | 5,92                         | 37,69                              | 1,87                         | 40                                 | 0                            |
|                                   | Log <sup>6</sup>          | 40                                 | 0                            | 40                                 | 0                            | 40                                 | 0                            | 40                                 | 0                            | 40                                 | 0                            | 40                                 | 0                            |
|                                   | Log <sup>7</sup>          | 40                                 | 0                            | 40                                 | 0                            | 40                                 | 0                            | 40                                 | 0                            | 40                                 | 0                            | 40                                 | 0                            |
|                                   | Log <sup>8</sup>          | 37,26                              | 2,61                         | 40                                 | 0                            | 40                                 | 0                            | 36,43                              | 5,32                         | 40                                 | 0                            | 40                                 | 0                            |
| Soap Powder + Lysoform            | Log <sup>1</sup>          | 26,94                              | 5,04 x 10 <sup>4</sup>       | 29,89                              | 1,64 x 10 <sup>3</sup>       | 31,46                              | 5,38 x 10 <sup>2</sup>       | 23,25                              | 5,51 x 10 <sup>5</sup>       | 26                                 | 5,74 x 10 <sup>4</sup>       | 27,72                              | 1,24 x 10 <sup>4</sup>       |
|                                   | Log <sup>2</sup>          | 28                                 | 8.66 x 10 <sup>3</sup>       | 30,59                              | 8,92 x 10 <sup>2</sup>       | 32,06                              | 2,44 x 10 <sup>2</sup>       | 28,91                              | 3,82 x 10 <sup>3</sup>       | 31,76                              | 3,34 x 10 <sup>2</sup>       | 33,67                              | 6,9 x 10 <sup>1</sup>        |
|                                   | Log <sup>3</sup>          | 31,8                               | 3,08 x 10 <sup>2</sup>       | 34,31                              | 3,41 x 10 <sup>1</sup>       | 37                                 | 3,23                         | 31,38                              | 4,98 x 10 <sup>2</sup>       | 34,51                              | 3,34 x 10 <sup>1</sup>       | 35,42                              | 1,35 x 10 <sup>1</sup>       |
|                                   | Log <sup>4</sup>          | 32,88                              | 1,44 x 10 <sup>2</sup>       | 36,62                              | 6,47 x 10 <sup>1</sup>       | 37,15                              | 3,2                          | 33,05                              | 1,02 x 10 <sup>2</sup>       | 34,48                              | 2,95 x 10 <sup>1</sup>       | 36,39                              | 5,51                         |
|                                   | Log <sup>5</sup>          | 40                                 | 0                            | 40                                 | 0                            | 40                                 | 0                            | 35,64                              | 1,06 x 10 <sup>1</sup>       | 40                                 | 0                            | 40                                 | 0                            |
|                                   | Log <sup>6</sup>          | 40                                 | 0                            | 40                                 | 0                            | 40                                 | 0                            | 37,48                              | 2,12                         | 40                                 | 0                            | 40                                 | 0                            |
|                                   | Log <sup>7</sup>          | 40                                 | 0                            | 40                                 | 0                            | 40                                 | 0                            | 40                                 | 0                            | 40                                 | 0                            | 37,74                              | 1,69                         |
|                                   | Log <sup>8</sup>          | 40                                 | 0                            | 40                                 | 0                            | 40                                 | 0                            | 36,54                              | 5,62                         | 40                                 | 0                            | 40                                 | 0                            |
| Soap Powder + Sodium Hypochlorite | Log <sup>1</sup>          | 40                                 | 0                            | 40                                 | 0                            | 40                                 | 0                            | 40                                 | 0                            | 40                                 | 0                            | 37,41                              | 2,25                         |
|                                   | Log <sup>2</sup>          | 40                                 | 0                            | 40                                 | 0                            | 40                                 | 0                            | 40                                 | 0                            | 38,76                              | 6,90 x 10 <sup>-1</sup>      | 40                                 | 0                            |
|                                   | Log <sup>3</sup>          | 40                                 | 0                            | 40                                 | 0                            | 40                                 | 0                            | 40                                 | 0                            | 40                                 | 0                            | 40                                 | 0                            |
|                                   | Log <sup>4</sup>          | 40                                 | 0                            | 40                                 | 0                            | 40                                 | 0                            | 40                                 | 0                            | 38,99                              | 5,64 x 10 <sup>-1</sup>      | 40                                 | 0                            |
|                                   | Log <sup>5</sup>          | 40                                 | 0                            | 40                                 | 0                            | 40                                 | 0                            | 40                                 | 0                            | 37,46                              | 2,16                         | 38,07                              | 1,26                         |
|                                   | Log <sup>6</sup>          | 40                                 | 0                            | 40                                 | 0                            | 40                                 | 0                            | 40                                 | 0                            | 40                                 | 0                            | 40                                 | 0                            |
|                                   | Log <sup>7</sup>          | 40                                 | 0                            | 40                                 | 0                            | 40                                 | 0                            | 40                                 | 0                            | 40                                 | 0                            | 40                                 | 0                            |
|                                   | Log <sup>8</sup>          | 40                                 | 0                            | 40                                 | 0                            | 40                                 | 0                            | 40                                 | 0                            | 40                                 | 0                            | 40                                 | 0                            |
| Sodium Hypochlorite               | Log <sup>1</sup>          | 40                                 | 0                            | 40                                 | 0                            | 40                                 | 0                            | 40                                 | 0                            | 40                                 | 0                            | 39,63                              | 3,22 x 10 <sup>-1</sup>      |
|                                   | Log <sup>2</sup>          | 40                                 | 0                            | 40                                 | 0                            | 40                                 | 0                            | 40                                 | 0                            | 40                                 | 0                            | 40                                 | 0                            |
|                                   | Log <sup>3</sup>          | 40                                 | 0                            | 40                                 | 0                            | 40                                 | 0                            | 40                                 | 0                            | 40                                 | 0                            | 40                                 | 0                            |
|                                   | Log <sup>4</sup>          | 40                                 | 0                            | 40                                 | 0                            | 40                                 | 0                            | 40                                 | 0                            | 40                                 | 0                            | 40                                 | 0                            |
|                                   | Log <sup>5</sup>          | 40                                 | 0                            | 40                                 | 0                            | 40                                 | 0                            | 40                                 | 0                            | 40                                 | 0                            | 40                                 | 0                            |
|                                   | Log <sup>6</sup>          | 40                                 | 0                            | 40                                 | 0                            | 40                                 | 0                            | 40                                 | 0                            | 40                                 | 0                            | 40                                 | 0                            |
|                                   | Log <sup>7</sup>          | 40                                 | 0                            | 40                                 | 0                            | 40                                 | 0                            | 40                                 | 0                            | 40                                 | 0                            | 40                                 | 0                            |
|                                   | Log <sup>8</sup>          | 40                                 | 0                            | 40                                 | 0                            | 40                                 | 0                            | 40                                 | 0                            | 40                                 | 0                            | 40                                 | 0                            |
| 70% alcohol <sup>c</sup>          | Log <sup>1</sup>          | 27,92                              | 9,19 x 10 <sup>3</sup>       | 30,1                               | 1,36 x 10 <sup>3</sup>       | 31,85                              | 2,93 x 10 <sup>2</sup>       | 26,94                              | 2,61 x 10 <sup>4</sup>       | 28,98                              | 3,97 x 10 <sup>3</sup>       | 32,11                              | 2,58 x 10 <sup>2</sup>       |
|                                   | Log <sup>2</sup>          | 28,9                               | 3,92 x 10 <sup>3</sup>       | 32,29                              | 2,02 x 10 <sup>2</sup>       | 34,3                               | 3,56 x 10 <sup>1</sup>       | 29,24                              | 2,92 x 10 <sup>3</sup>       | 31,45                              | 4,21 x 10 <sup>2</sup>       | 34,64                              | 2,9 x 10 <sup>1</sup>        |
|                                   | Log <sup>3</sup>          | 35,99                              | 7,93                         | 37,12                              | 2,98                         | 36,39                              | 5,5                          | 31,99                              | 2,71 x 10 <sup>2</sup>       | 34,75                              | 2,31 x 10 <sup>1</sup>       | 40                                 | 0                            |
|                                   | Log <sup>4</sup>          | 40                                 | 0                            | 40                                 | 0                            | 40                                 | 0                            | 35,21                              | 3,16 x 10 <sup>1</sup>       | 36,19                              | 6,73                         | 37,52                              | 2,04                         |
|                                   | Log <sup>5</sup>          | 36,9                               | 3,87                         | 37,65                              | 1,82                         | 40                                 | 0                            | 36,18                              | 6,93                         | 40                                 | 0                            | 40                                 | 0                            |
|                                   | Log <sup>6</sup>          | 37,55                              | 1,99                         | 40                                 | 0                            | 40                                 | 0                            | 40                                 | 0                            | 40                                 | 0                            | 40                                 | 0                            |
|                                   | Log <sup>7</sup>          | 40                                 | 0                            | 40                                 | 0                            | 40                                 | 0                            | 40                                 | 0                            | 40                                 | 0                            | 40                                 | 0                            |
|                                   | Log <sup>8</sup>          | 40                                 | 0                            | 40                                 | 0                            | 40                                 | 0                            | 40                                 | 0                            | 40                                 | 0                            | 40                                 | 0                            |
| Wash Control                      | Log <sup>1</sup>          | 30,09                              | 1,38 x 10 <sup>3</sup>       | 32,94                              | 1,22 x 10 <sup>2</sup>       | 35,48                              | 1 x 10 <sup>2</sup>          | 29,86                              | 1,76 x 10 <sup>3</sup>       | 30,19                              | 1,63 x 10 <sup>2</sup>       | 30,21                              | 2,19 x 10 <sup>3</sup>       |
|                                   | Log <sup>2</sup>          | 33,69                              | 5,88 x 10 <sup>1</sup>       | 36,21                              | 6,55                         | 36,62                              | 4,82                         | 30,63                              | 9,8 x 10 <sup>2</sup>        | 34,34                              | 3,35 x 10 <sup>1</sup>       | 36,37                              | 6,42                         |
|                                   | Log <sup>3</sup>          | 37,57                              | 1,96                         | 40                                 | 0                            | 37,32                              | 2,44                         | 40                                 | 0                            | 40                                 | 0                            | 40                                 | 0                            |
|                                   | Log <sup>4</sup>          | 40                                 | 0                            | 37,67                              | 1,79                         | 40                                 | 0                            | 40                                 | 0                            | 37,42                              | 2,23                         | 40                                 | 0                            |
|                                   | Log <sup>5</sup>          | 36,45                              | 5,22                         | 40                                 | 0                            | 40                                 | 0                            | 40                                 | 0                            | 40                                 | 0                            | 40                                 | 0                            |
|                                   | Log <sup>6</sup>          | 40                                 | 0                            | 40                                 | 0                            | 40                                 | 0                            | 40                                 | 0                            | 40                                 | 0                            | 40                                 | 0                            |
|                                   | Log <sup>7</sup>          | 40                                 | 0                            | 40                                 | 0                            | 40                                 | 0                            | 40                                 | 0                            | 40                                 | 0                            | 40                                 | 0                            |
|                                   | Log <sup>8</sup>          | 40                                 | 0                            | 40                                 | 0                            | 40                                 | 0                            | 40                                 | 0                            | 40                                 | 0                            | 40                                 | 0                            |
| Virus Control                     | Log <sup>1</sup>          | 40                                 | 0                            | 40                                 | 0                            | 40                                 | 0                            | 40                                 | 0                            | 40                                 | 0                            | 40                                 | 0                            |
|                                   | Log <sup>2</sup>          | 40                                 | 0                            | 40                                 | 0                            | 40                                 | 0                            | 40                                 | 0                            | 37,52                              | 2,04                         | 40                                 | 0                            |
|                                   | Log <sup>3</sup>          | 40                                 | 0                            | 40                                 | 0                            | 40                                 | 0                            | 40                                 | 0                            | 40                                 | 0                            | 40                                 | 0                            |
|                                   | Log <sup>4</sup>          | 40                                 | 0                            | 40                                 | 0                            | 40                                 | 0                            | 40                                 | 0                            | 40                                 | 0                            | 40                                 | 0                            |
|                                   | Log <sup>5</sup>          | 40                                 | 0                            | 40                                 | 0                            | 40                                 | 0                            | 40                                 | 0                            | 40                                 | 0                            | 40                                 | 0                            |
|                                   | Log <sup>6</sup>          | 40                                 | 0                            | 40                                 | 0                            | 40                                 | 0                            | 40                                 | 0                            | 40                                 | 0                            | 40                                 | 0                            |

|  |                        |    |   |    |   |    |   |    |   |    |   |    |   |
|--|------------------------|----|---|----|---|----|---|----|---|----|---|----|---|
|  | <b>Log<sup>7</sup></b> | 40 | 0 | 40 | 0 | 40 | 0 | 40 | 0 | 40 | 0 | 40 | 0 |
|  | <b>Log<sup>8</sup></b> | 40 | 0 | 40 | 0 | 40 | 0 | 40 | 0 | 40 | 0 | 40 | 0 |

a = All experiments were performed in duplicates, the data presented in the table are the means of Cts and viral loads from rinses; b = Viral loads are presented in the concentration of PFU/ml.

Supplementary Table S2

| P1                                |                                       |                                    |                              |                                    |                              |                                    |                              |                                    |                              |                                    |                              |                                    |                              |
|-----------------------------------|---------------------------------------|------------------------------------|------------------------------|------------------------------------|------------------------------|------------------------------------|------------------------------|------------------------------------|------------------------------|------------------------------------|------------------------------|------------------------------------|------------------------------|
| Chemical Agents                   | Viral Suspension (Log <sup>10</sup> ) | Soak Time                          |                              |                                    |                              |                                    |                              |                                    |                              |                                    |                              |                                    |                              |
|                                   |                                       | 10 min                             |                              |                                    |                              |                                    |                              | 30 min                             |                              |                                    |                              |                                    |                              |
|                                   |                                       | 1 <sup>st</sup> Rinse <sup>a</sup> |                              | 2 <sup>nd</sup> Rinse <sup>a</sup> |                              | 3 <sup>rd</sup> Rinse <sup>a</sup> |                              | 1 <sup>st</sup> Rinse <sup>a</sup> |                              | 2 <sup>nd</sup> Rinse <sup>a</sup> |                              | 3 <sup>rd</sup> Rinse <sup>a</sup> |                              |
|                                   |                                       | Ct value mean                      | Viral Load mean <sup>b</sup> | Ct value mean                      | Viral Load mean <sup>b</sup> | Ct value mean                      | Viral Load mean <sup>b</sup> | Ct value mean                      | Viral Load mean <sup>b</sup> | Ct value mean                      | Viral Load mean <sup>b</sup> | Ct value mean                      | Viral Load mean <sup>b</sup> |
| Soap Powder                       | Log <sup>1</sup>                      | 25,24                              | 1,54 x 10 <sup>4</sup>       | 28                                 | 2,1 x 10 <sup>3</sup>        | 29                                 | 5,4 x 10 <sup>3</sup>        | 25,1                               | 1,77 x 10 <sup>4</sup>       | 27,87                              | 2,27 x 10 <sup>3</sup>       | 29,42                              | 7,68 x 10 <sup>2</sup>       |
|                                   | Log <sup>2</sup>                      | 27,98                              | 2,17 x 10 <sup>3</sup>       | 30,59                              | 3,18 x 10 <sup>2</sup>       | 31,6                               | 1,53 x 10 <sup>2</sup>       | 27,64                              | 2,7 x 10 <sup>3</sup>        | 29,85                              | 5,44 x 10 <sup>2</sup>       | 31,98                              | 1,22 x 10 <sup>2</sup>       |
|                                   | Log <sup>3</sup>                      | 31,73                              | 1,41 x 10 <sup>2</sup>       | 34,11                              | 2,52 x 10 <sup>1</sup>       | 36,1                               | 5,57                         | 31,75                              | 1,41 x 10 <sup>2</sup>       | 33,78                              | 3,25 x 10 <sup>1</sup>       | 36,11                              | 5,92                         |
|                                   | Log <sup>4</sup>                      | 35,75                              | 7,7                          | 36,65                              | 4,02                         | 34,8                               | 1,34 x 10 <sup>1</sup>       | 36,44                              | 4,67                         | 37,59                              | 2,04                         | 40                                 | 0                            |
|                                   | Log <sup>5</sup>                      | 33,35                              | 4,46 x 10 <sup>1</sup>       | 35,22                              | 1,12 x 10 <sup>1</sup>       | 37,36                              | 2,36                         | 33,05                              | 5,38 x 10 <sup>1</sup>       | 35,77                              | 7,91                         | 37,64                              | 1,97                         |
|                                   | Log <sup>6</sup>                      | 36,41                              | 5,08                         | 40                                 | 0                            | 40                                 | 0                            | 35,85                              | 7,12                         | 38,01                              | 1,51                         | 40                                 | 0                            |
|                                   | Log <sup>7</sup>                      | 40                                 | 0                            | 40                                 | 0                            | 40                                 | 0                            | 37,42                              | 2,31                         | 40                                 | 0                            | 40                                 | 6,25x 10 <sup>-1</sup>       |
|                                   | Log <sup>8</sup>                      | 40                                 | 0                            | 40                                 | 0                            | 40                                 | 0                            | 39,23                              | 0                            | 40                                 | 0                            | 40                                 | 0                            |
| Soap Powder + Lysoform            | Log <sup>1</sup>                      | 25,38                              | 1,36 x 10 <sup>4</sup>       | 28,16                              | 1,9 x 10 <sup>3</sup>        | 28,91                              | 1,11 x 10 <sup>3</sup>       | 25                                 | 1,8 x 10 <sup>4</sup>        | 28,42                              | 1,6 x 10 <sup>3</sup>        | 29,03                              | 1,01 x 10 <sup>3</sup>       |
|                                   | Log <sup>2</sup>                      | 27,19                              | 3,8 x 10 <sup>3</sup>        | 29,78                              | 5,92 x 10 <sup>2</sup>       | 31,24                              | 2,03 x 10 <sup>2</sup>       | 26,87                              | 5,09 x 10 <sup>3</sup>       | 29,66                              | 7,24 x 10 <sup>2</sup>       | 31,39                              | 1,82 x 10 <sup>2</sup>       |
|                                   | Log <sup>3</sup>                      | 31,22                              | 2,38 x 10 <sup>2</sup>       | 33,36                              | 3,26 x 10 <sup>1</sup>       | 35,68                              | 1,02 x 10 <sup>1</sup>       | 31,14                              | 2,15 x 10 <sup>2</sup>       | 33,28                              | 4,58 x 10 <sup>1</sup>       | 35,78                              | 8,86                         |
|                                   | Log <sup>4</sup>                      | 35,25                              | 1,27 x 10 <sup>1</sup>       | 37,02                              | 3,22                         | 0                                  | 0                            | 34,88                              | 1,45 x 10 <sup>1</sup>       | 36,88                              | 3,89                         | 37,54                              | 2,12                         |
|                                   | Log <sup>5</sup>                      | 32,69                              | 7,27 x 10 <sup>1</sup>       | 35,48                              | 9,2                          | 36,07                              | 6,2                          | 32,81                              | 6,59                         | 35,93                              | 1,02 x 10 <sup>1</sup>       | 36,83                              | 3,52                         |
|                                   | Log <sup>6</sup>                      | 36,73                              | 4,44                         | 37,18                              | 2,89                         | 37,66                              | 1,94                         | 35,88                              | 8,98                         | 39,04                              | 7,16 x 10 <sup>-1</sup>      | 40                                 | 0                            |
|                                   | Log <sup>7</sup>                      | 38,5                               | 1,06                         | 40                                 | 0                            | 40                                 | 0                            | 40                                 | 0                            | 40                                 | 0                            | 38,18                              | 1,33                         |
|                                   | Log <sup>8</sup>                      | 37,7                               | 1,88                         | 40                                 | 0                            | 40                                 | 0                            | 40                                 | 0                            | 40                                 | 0                            | 40                                 | 0                            |
| Soap Powder + Sodium Hypochlorite | Log <sup>1</sup>                      | 40                                 | 0                            | 40                                 | 0                            | 40                                 | 0                            | 40                                 | 0                            | 40                                 | 0                            | 40                                 | 0                            |
|                                   | Log <sup>2</sup>                      | 39,1                               | 6,86 x 10 <sup>-1</sup>      | 40                                 | 0                            | 40                                 | 0                            | 40                                 | 0                            | 39,41                              | 5,49 x 10 <sup>-1</sup>      | 40                                 | 0                            |
|                                   | Log <sup>3</sup>                      | 40                                 | 0                            | 40                                 | 0                            | 40                                 | 0                            | 40                                 | 0                            | 40                                 | 0                            | 40                                 | 0                            |
|                                   | Log <sup>4</sup>                      | 40                                 | 0                            | 40                                 | 0                            | 40                                 | 0                            | 40                                 | 0                            | 40                                 | 0                            | 40                                 | 0                            |
|                                   | Log <sup>5</sup>                      | 40                                 | 0                            | 40                                 | 0                            | 40                                 | 0                            | 40                                 | 0                            | 40                                 | 0                            | 40                                 | 0                            |
|                                   | Log <sup>6</sup>                      | 40                                 | 0                            | 40                                 | 0                            | 40                                 | 0                            | 40                                 | 0                            | 40                                 | 0                            | 40                                 | 0                            |
|                                   | Log <sup>7</sup>                      | 40                                 | 0                            | 40                                 | 0                            | 40                                 | 0                            | 40                                 | 0                            | 40                                 | 0                            | 40                                 | 0                            |
|                                   | Log <sup>8</sup>                      | 40                                 | 0                            | 40                                 | 0                            | 38,5                               | 1,06                         | 40                                 | 0                            | 40                                 | 0                            | 40                                 | 0                            |
| Sodium Hypochlorite               | Log <sup>1</sup>                      | 40                                 | 0                            | 40                                 | 0                            | 40                                 | 0                            | 40                                 | 0                            | 40                                 | 0                            | 40                                 | 0                            |
|                                   | Log <sup>2</sup>                      | 40                                 | 0                            | 40                                 | 0                            | 40                                 | 0                            | 40                                 | 0                            | 40                                 | 0                            | 40                                 | 0                            |
|                                   | Log <sup>3</sup>                      | 40                                 | 0                            | 40                                 | 0                            | 40                                 | 0                            | 40                                 | 0                            | 40                                 | 0                            | 40                                 | 0                            |
|                                   | Log <sup>4</sup>                      | 40                                 | 0                            | 40                                 | 0                            | 40                                 | 0                            | 40                                 | 0                            | 40                                 | 0                            | 40                                 | 0                            |
|                                   | Log <sup>5</sup>                      | 40                                 | 0                            | 40                                 | 0                            | 40                                 | 0                            | 40                                 | 0                            | 40                                 | 0                            | 40                                 | 0                            |
|                                   | Log <sup>6</sup>                      | 40                                 | 0                            | 40                                 | 0                            | 40                                 | 0                            | 40                                 | 0                            | 40                                 | 0                            | 40                                 | 0                            |
|                                   | Log <sup>7</sup>                      | 40                                 | 0                            | 40                                 | 0                            | 40                                 | 0                            | 40                                 | 0                            | 40                                 | 0                            | 40                                 | 0                            |
|                                   | Log <sup>8</sup>                      | 40                                 | 0                            | 40                                 | 0                            | 40                                 | 0                            | 40                                 | 0                            | 40                                 | 0                            | 40                                 | 0                            |
| 70% alcohol <sup>c</sup>          | Log <sup>1</sup>                      | 29,5                               | 7,42 x 10 <sup>2</sup>       | 30,94                              | 2,5 x 10 <sup>2</sup>        | 31,76                              | 1,37 x 10 <sup>2</sup>       | 28,5                               | 1,46                         | 31,9                               | 1,27 x 10 <sup>2</sup>       | 34,26                              | 2,25 x 10 <sup>1</sup>       |
|                                   | Log <sup>2</sup>                      | 30,18                              | 4,28 x 10 <sup>2</sup>       | 32,92                              | 5,92 x 10 <sup>1</sup>       | 32,68                              | 7,22 x 10 <sup>1</sup>       | 29,65                              | 6,96 x 10 <sup>2</sup>       | 33,29                              | 4,75 x 10 <sup>1</sup>       | 35,26                              | 1,08 x 10 <sup>1</sup>       |
|                                   | Log <sup>3</sup>                      | 32,82                              | 6,82 10 <sup>1</sup>         | 34,35                              | 2,15 x 10 <sup>1</sup>       | 35,47                              | 9,43                         | 33,08                              | 5,30 x 10 <sup>1</sup>       | 33,73                              | 3,57 x 10 <sup>1</sup>       | 36,89                              | 3,38                         |
|                                   | Log <sup>4</sup>                      | 40                                 | 0                            | 37,27                              | 2,57                         | 0                                  | 0                            | 38,1                               | 3,45                         | 38,8                               | 8,52 x 10 <sup>-1</sup>      | 39,29                              | 5,98 x 10 <sup>-1</sup>      |
|                                   | Log <sup>5</sup>                      | 34,11                              | 2,56                         | 36,32                              | 5,1                          | 36,45                              | 5,97                         | 37,26                              | 3,89                         | 38,49                              | 1,07                         | 38,87                              | 8,1                          |
|                                   | Log <sup>6</sup>                      | 37,74                              | 1,83                         | 37,58                              | 2,05                         | 40                                 | 0                            | 37,4                               | 4,18                         | 37,47                              | 2,22                         | 38,08                              | 1,56                         |
|                                   | Log <sup>7</sup>                      | 40                                 | 0                            | 38,3                               | 1,22                         | 40                                 | 0                            | 40                                 | 0                            | 40                                 | 0                            | 38,12                              | 1,39                         |
|                                   | Log <sup>8</sup>                      | 40                                 | 0                            | 39,56                              | 4,92 x 10 <sup>-1</sup>      | 40                                 | 0                            | 38,62                              | 1,22                         | 39,09                              | 6,91 x 10 <sup>-1</sup>      | 38,58                              | 9,99 x 10 <sup>-1</sup>      |
| Wash Control                      | Log <sup>1</sup>                      | 29,53                              | 9,42 x 10 <sup>2</sup>       | 29,41                              | 7,62 x 10 <sup>2</sup>       | 31,32                              | 1,95 x 102                   | 28,58                              | 1,35 x 10 <sup>3</sup>       | 29,18                              | 1,44 x 10 <sup>2</sup>       | 29,99                              | 4,9 x 10 <sup>2</sup>        |
|                                   | Log <sup>2</sup>                      | 30,97                              | 2,42 x 10 <sup>2</sup>       | 32,64                              | 2,89 x 102                   | 32,9                               | 1,4 x 102                    | 31,4                               | 1,86 x 10 <sup>2</sup>       | 30,82                              | 2,37 x 10 <sup>2</sup>       | 32,18                              | 1,01 x10 <sup>2</sup>        |
|                                   | Log <sup>3</sup>                      | 35,4                               | 2,19 x 10 <sup>2</sup>       | 35,45                              | 9,56                         | 37,21                              | 2,75                         | 34,23                              | 2,44 x 101                   | 35,27                              | 1,53 x 10 <sup>1</sup>       | 36,68                              | 3,93                         |
|                                   | Log <sup>4</sup>                      | 37,44                              | 2,27                         | 40                                 | 0                            | 40                                 | 0                            | 40                                 | 0                            | 40                                 | 0                            | 40                                 | 0                            |
|                                   | Log <sup>5</sup>                      | 38,05                              | 9,19 x 10 <sup>1</sup>       | 36,55                              | 4,31                         | 36,6                               | 4,71                         | 34,88                              | 3,05 x 10 <sup>1</sup>       | 35,53                              | 1,16 x 10 <sup>1</sup>       | 37                                 | 3,15                         |
|                                   | Log <sup>6</sup>                      | 38,04                              | 1,47                         | 40                                 | 0                            | 40                                 | 0                            | 37,57                              | 2,07                         | 40                                 | 0                            | 38,75                              | 8,83x10 <sup>-1</sup>        |
|                                   | Log <sup>7</sup>                      | 40                                 | 0                            | 40                                 | 0                            | 40                                 | 0                            | 39,47                              | 5,25x10-1                    | 40                                 | 0                            | 38,68                              | 9,29x10 <sup>-1</sup>        |
|                                   | Log <sup>8</sup>                      | 40                                 | 0                            | 40                                 | 0                            | 40                                 | 0                            | 40                                 | 0                            | 40                                 | 0                            | 40                                 | 0                            |
| Virus Control                     | Log <sup>1</sup>                      | 40                                 | 0                            | 40                                 | 0                            | 40                                 | 0                            | 40                                 | 0                            | 40                                 | 0                            | 40                                 | 0                            |
|                                   | Log <sup>2</sup>                      | 40                                 | 0                            | 40                                 | 0                            | 40                                 | 0                            | 40                                 | 0                            | 40                                 | 0                            | 40                                 | 0                            |
|                                   | Log <sup>3</sup>                      | 40                                 | 0                            | 40                                 | 0                            | 40                                 | 0                            | 40                                 | 0                            | 40                                 | 0                            | 40                                 | 0                            |

|  |                        |    |   |    |   |    |   |    |   |    |   |    |   |
|--|------------------------|----|---|----|---|----|---|----|---|----|---|----|---|
|  | <b>Log<sup>4</sup></b> | 40 | 0 | 40 | 0 | 40 | 0 | 40 | 0 | 40 | 0 | 40 | 0 |
|  | <b>Log<sup>5</sup></b> | 40 | 0 | 40 | 0 | 40 | 0 | 40 | 0 | 40 | 0 | 40 | 0 |
|  | <b>Log<sup>6</sup></b> | 40 | 0 | 40 | 0 | 40 | 0 | 40 | 0 | 40 | 0 | 40 | 0 |
|  | <b>Log<sup>7</sup></b> | 40 | 0 | 40 | 0 | 40 | 0 | 40 | 0 | 40 | 0 | 40 | 0 |
|  | <b>Log<sup>8</sup></b> | 40 | 0 | 40 | 0 | 40 | 0 | 40 | 0 | 40 | 0 | 40 | 0 |

a = All experiments were performed in duplicates, the data presented in the table are the means of Cts and viral loads from rinses; b = Viral loads are presented in the concentration of PFU/ml.
